# Supplementary material
Source: Springer Nature journal article supplement (https://www.springermedizin.de/resource/supplementary/12955_2004_168_MOESM1_ESM.pdf/9559812)

Adults

Adolescents or infants

Long-term TTO

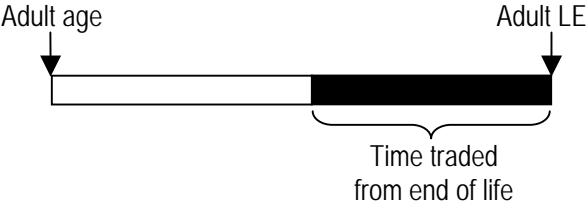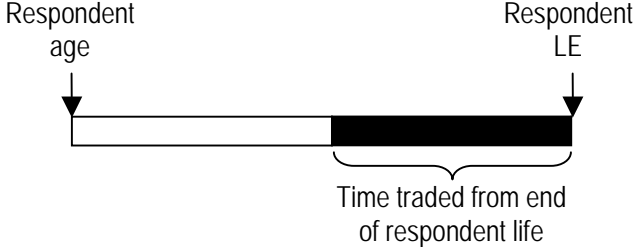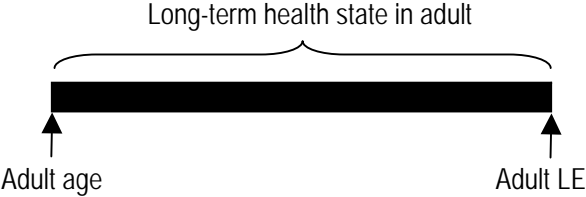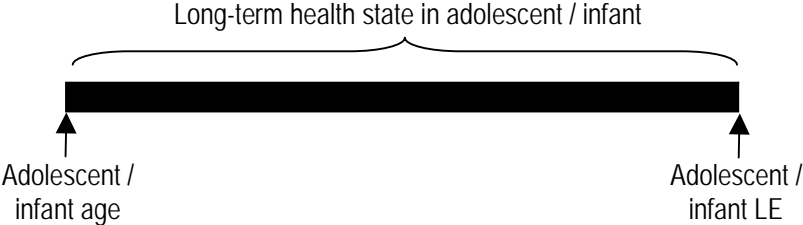

Short-term TTO

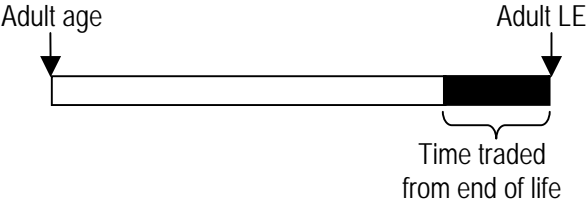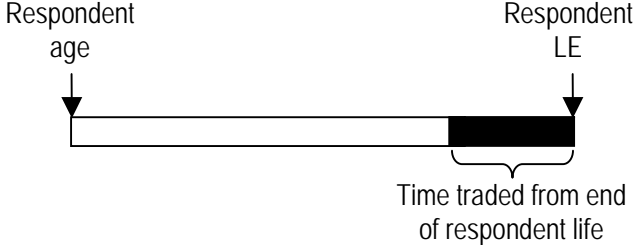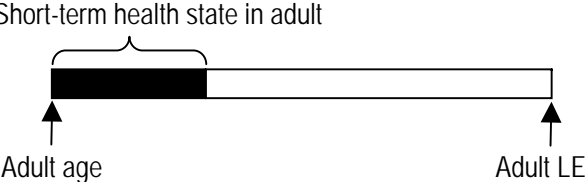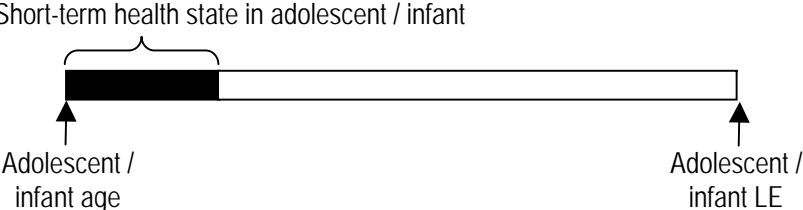

Supplement: MOESM1 [file 9559812]
